Articles of interest in other COB journals

From *Journal of Cell Science*

**Rescue of oogenesis in Cx37-null mutant mice by oocyte-specific replacement with Cx43**

Tony Y. Li, Deanne Colley, Kevin J. Barr, Siu-Pok Yee and Gerald M. Kidder

Li, T. Y. et al. 2007. *J. Cell Sci.* doi: 10.1242/jcs.03488

**Phosphorylation of WAVE2 by MAP kinases regulates persistent cell migration and polarity**

Christopher M. Danson, Shirin M. Pocha, Graham B. Bloomberg and Giles O. Cory

Danson, C. M. et al. 2007. *J. Cell Sci.* doi: 10.1242/jcs.013714
